# Supplementary material
Source: MDPI journal article supplement (https://www.mdpi.com/2073-4344/12/11/1414)
Supplement: s1 [file s1]

# In Situ Assembling of Well Defined MoS<sub>2</sub> Slabs on Shape-Tailored Anatase TiO<sub>2</sub> Nanostructures: Heterojunctions Role in Phenol Photodegradation

Rosangela Santalucia, Paolo Negro, Tiziano Vacca, Francesco Pellegrino, Alessandro Damin, Federico Cesano \* and Domenica Scarano \*

Department of Chemistry and NIS (Nanostructured Interfaces and Surfaces) Interdepartmental Centre, University of Torino & INSTM-UdR Torino, Via P. Giuria 7, 10125 Torino, Italy

\* Correspondence: federico.cesano@unito.it (F.C.); domenica.scarano@unito.it (D.S.); Tel.: +39-011-6707845 (F.C.); Tel.: +39-011-6707834 (D.S.)

## Supplementary Data

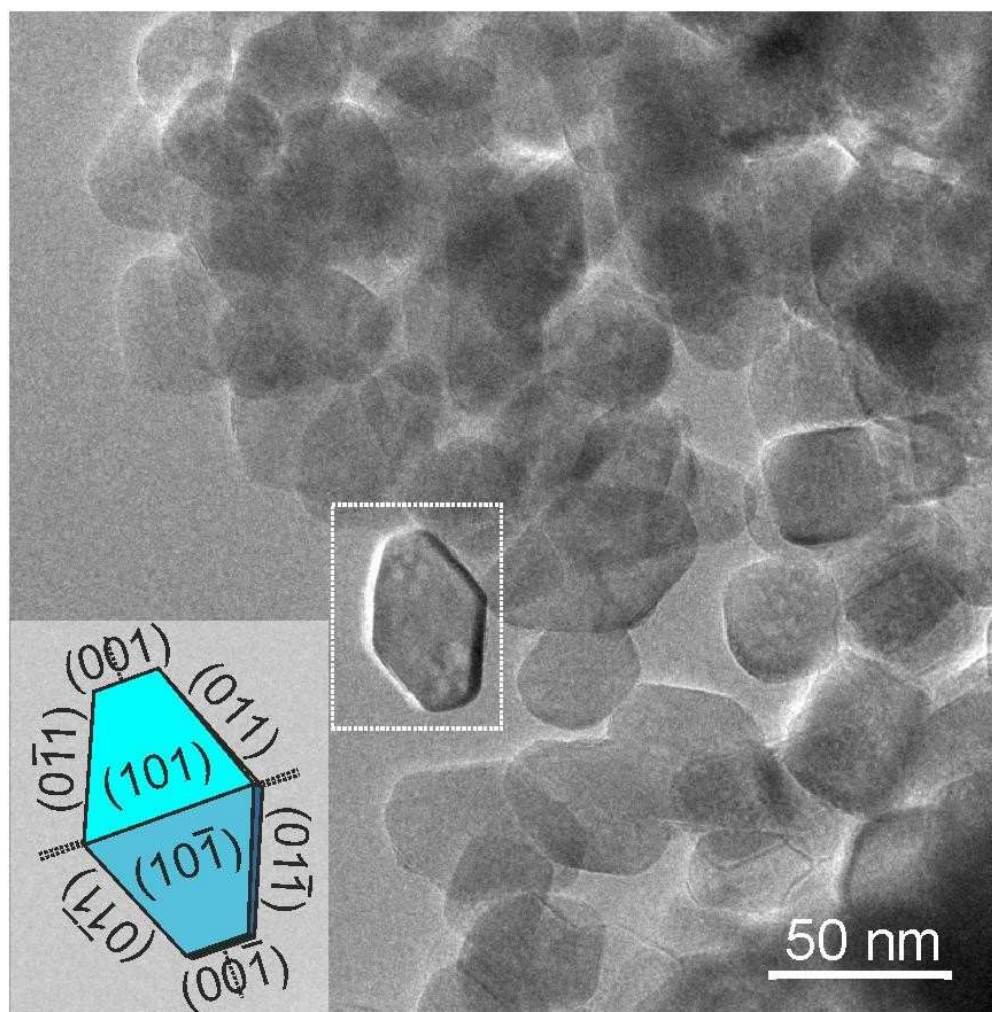

**Figure S1.** TEM image of MoS<sub>2</sub>/bipyramidal TiO<sub>2</sub> nanoparticles with exposed TiO<sub>2</sub> single nanocrystals nanocrystals with the assignment of exposed surfaces.

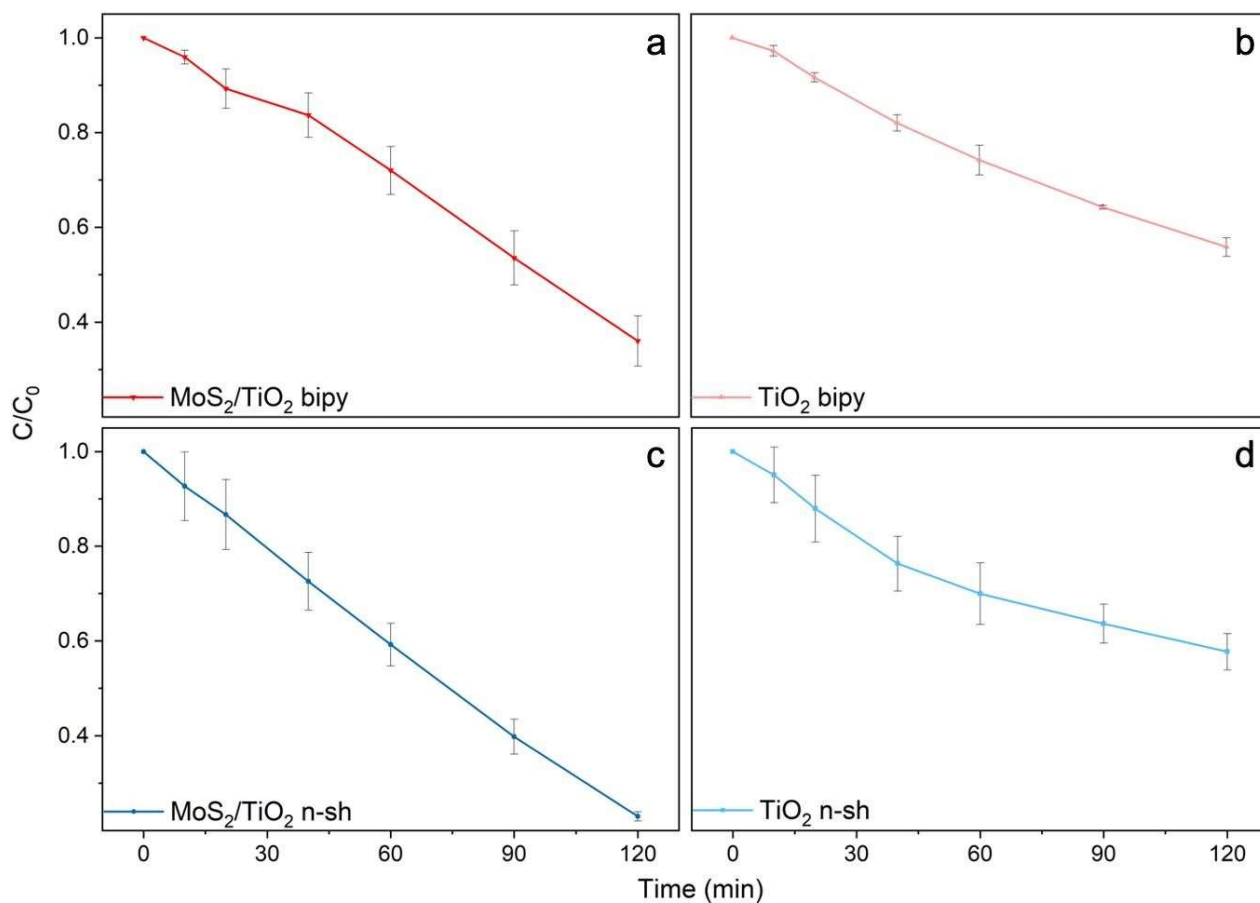

**Figure S2.** Phenol degradation profiles, expressed as the ratio between concentration after irradiation ( $C$ ) and concentration before irradiation ( $C_0$ ) of: (a)  $\text{MoS}_2/\text{TiO}_2$  bipy (red curve), (b) bipyramidal  $\text{TiO}_2$  nanoparticles (light red curve), (c)  $\text{MoS}_2/\text{TiO}_2$  n-sh (blue curve), and (d)  $\text{TiO}_2$  nanoshets (light blue curve).
